# Supplementary material for: What can we learn from the hair of the dog? Complex effects of endogenous and exogenous stressors on canine hair cortisol
Source: PLoS One. 2019 May 22;14(5):e0216000. doi: 10.1371/journal.pone.0216000 (PMC6530888; doi:10.1371/journal.pone.0216000)
Supplement: S2 File — (XLSX) [file pone.0216000.s002.xlsx]

## Sheet: Data for PLOS
Group	CORTVALUE	Inwhichcountrydoyoulive	Areyouthemaincarerofyourdogi.e.youarethemainpersoninyourhousehol	Pleaseselectyourgender	Pleaseselectyouragerangeinyears	Whatgenderisyourdog	IsyourdogregisteredwiththeKennelClub	Whatistheweightofyourdoginilograms	HowoldisyourdogPleasestateinMONTHSe.g.if5years5monthsenter65N.B	Howoldwasyourdogwhenyouacquiredthem Pleasestatein	Wheredidyouacquireyourdogfrom	Isthereaknownhistoryofepilepsyinyourdogsfamilyline	GROUPING3CATS	Childrenunder5yearsoldNumber	Childrenaged510yearsoldNumber	Childrenaged1116yearsoldNumber	Childrenaged1718yearsoldNumber	Adultsagedover18yearsoldNumber	DogsNumber	CatsNumber	RabbitsNumber	Rodentse.g.guineapigsratsmicehamstersgerbilsNumber	BirdsNumber	FishamphibiansandreptilesNumber	Howmanyhoursisyourdogusuallyleftalonewithoutpeopleonanaverageday	Agility	Dogshowing	Flyball	Rewardtraining	Punishmenttraining	TRAININGMETHOD	Foodrewardsgivingatreatwhenthedogdoesacorrectbehaviour	Clickertrainingusingtheclicksoundfollowedbyatreatwhenthedogdoesa	Playinge.g.throwingatoywhenthedogdoesacorrectbehaviour	Strokingorpattingwhenthedogbehaveswellverbalpraise	Barkactivatedcitronellacollarautomaticallyspraysstrongsmellingli	Prongcollarmetalchainwithextensionsthatputpressureondogsneckwhen	Petcorrectoraerosoltypespraydirectedatdogtointerruptunwantedbeha	Barkactivatedelectronictrainingcollarautomaticallygiveselectroni	Waterpistolsprayedtointerruptabehaviourwhendogdoessomethingwrong	Verbalpunishmente.g.tellingofforshoutingwhenthedogdoessomethingw	Electronictrainingcollartogiveanelectroniccorrectionwhenthedogdo	Chokechainmetalcollarthatatightensondogsnecktopreventpullingonle	Electronicboundaryfencetopreventthedogfromwanderingoffthepropert	Physicalpunishmente.g.smackingwhenthedogdoessomethingwrong	Husherdevicethatpreventsthedogbarking	Shuttingawayphysicallyremovingfromtheroomsometimescalledtimeoutw	Pullingbackonleadwhenthedogpulls	Harnesstopreventpullingonlead
EPI	0.149	England	Yes	Female	46-60	Male Neutered	No	20	36	2	Breeder (Primarily pet dogs)	I don't know	PET	0	0	2	0	2	zNone	0	0	0	0	0	0	Never	Never	Never	4	1	MIX	1	1	1	1	0	0	0	0	0	0	0	0	0	0	0	0	1	1
EPI	0.1328	Wales	Yes	Female	61-75	Male Neutered	No	9999	120	6	Rescue centre (e.g. RSPCA, Dogs Trust, Blue Cross)	I don't know	PET	0	0	0	0	2	One	3	9999	9999	9999	9999	0	Yes: but has now stopped	9999	9999	4	0	REWARD	1	1	1	1	0	0	0	0	0	0	0	0	0	0	0	0	0	1
EPI	0.1967	England	Yes	Female	61-75	Female Neutered	Yes	9999	58	2	Breeder (Primarily working dogs)	No	COMPETIT	0	0	0	0	1	Three plus	1	0	0	0	0	2	Yes: still participates	Never	Never	2	2	MIX	1	0	0	1	0	0	0	0	1	1	0	0	0	0	0	0	0	1
EPI	0.1275	England	Yes	Female	61-75	Female Neutered	No	20	59	3	Farm	I don't know	WORKING	0	0	0	0	2	9999	1	9999	9999	9999	9999	2	9999	9999	9999	3	0	REWARD	1	0	1	1	0	0	0	0	0	0	0	0	0	0	0	0	0	0
EPI	0.0743	Northern Ireland	Yes	Female	18-30	Male Neutered	No	30	46	7	Rescue centre (e.g. RSPCA, Dogs Trust, Blue Cross)	I don't know	PET	0	0	0	0	4	zNone	0	0	0	0	2	3	Never	Never	Never	3	4	MIX	1	0	1	1	0	0	0	0	0	1	0	1	0	0	0	1	1	1
EPI	0.0979	England	Yes	Female	46-60	Male Neutered	Yes	20	53	2	Breeder (Primarily pet dogs)	No	PET	0	0	0	1	3	zNone	2	0	0	0	0	0	Yes: but has now stopped	Never	Never	2	3	MIX	1	0	0	1	0	0	1	0	0	1	0	0	0	0	0	0	1	0
EPI	0.1737	Scotland	Yes	Female	31-45	Male Neutered	Yes	25	90	1.5	Breeder (Primarily working dogs)	Yes	COMPETIT	1	0	0	0	2	zNone	1	0	0	0	0	3	Never	Never	Never	4	1	MIX	1	1	1	1	0	0	0	0	0	1	0	0	0	0	0	0	0	1
EPI	0.1853	England	Yes	Female	31-45	Male Neutered	Yes	18.75	96	6	Rescue centre (e.g. RSPCA, Dogs Trust, Blue Cross)	I don't know	PET	0	0	0	0	2	zNone	0	0	0	0	0	2	Yes: but has now stopped	Never	Never	4	0	REWARD	1	1	1	1	0	0	0	0	0	0	0	0	0	0	0	0	0	0
EPI	0.2464	England	Yes	Female	61-75	Female Neutered	No	21	89	2	Family or friend	No	PET	0	0	0	0	1	zNone	0	0	0	0	0	1	Never	Never	Never	3	2	MIX	1	0	1	1	0	0	0	0	0	1	0	0	0	0	0	1	0	1
EPI	0.1542	England	Yes	Female	61-75	Male Entire	No	22	48	3	Farm	I don't know	PET	0	0	0	0	0	zNone	0	0	0	1	0	3	Never	Never	Never	3	3	MIX	1	0	1	1	0	0	0	0	0	1	0	0	0	0	0	1	1	1
EPI	0.2871	Australia	Yes	Female	61-75	Female Neutered	Yes	22.5	69	2	Breeder (Primarily working dogs)	Yes	PET	9999	9999	9999	9999	1	zNone	0	0	0	0	0	0	Never	Never	Never	2	0	REWARD	1	0	0	1	0	0	0	0	0	0	0	0	0	0	0	0	0	1
EPI	0.0914	England	No	Female	46-60	Male Entire	No	19	27	3	Farm	No	PET	9999	9999	9999	9999	2	zNone	0	0	0	0	0	3	Yes: but has now stopped	Never	Never	3	2	MIX	1	0	1	1	0	0	0	0	0	0	0	0	0	0	0	1	1	1
EPI	0.235	England	Yes	Female	18-30	Male Neutered	Yes	14.2	114	6	Border Collie breed rescue	I don't know	WORKING	0	0	0	0	2	One	0	0	0	0	0	2	Yes: still participates	Never	Yes: still participates	4	2	MIX	1	1	1	1	0	0	0	0	0	1	0	0	0	0	0	1	0	1
EPI	0.1122	England	Yes	Female	31-45	Male Neutered	Yes	24	49	2	Farm	I don't know	PET	0	0	0	0	1	One	1	0	0	0	0	0	Yes: but has now stopped	Never	Never	4	0	REWARD	1	1	1	1	0	0	0	0	0	0	0	0	0	0	0	0	0	1
EPI	0.0236	England	No	Female	over 76	Male Entire	Yes	24.3	118	22	Breeder (Primarily working dogs)	Yes	COMPETIT	9999	9999	9999	9999	1	One	9999	9999	9999	5	9999	0	Yes: but has now stopped	9999	9999	4	0	REWARD	1	1	1	1	0	0	0	0	0	0	0	0	0	0	0	0	0	0
EPI	0.1771	England	Yes	Female	61-75	Female Entire	No	18.4	31	3	Breeder (Primarily working dogs)	No	PET	9999	9999	9999	9999	3	One	9999	9999	9999	9999	6	0	Never	Never	Never	2	2	MIX	1	0	0	1	0	0	1	0	0	0	0	0	0	0	0	0	1	1
EPI	0.1733	England	No	Female	46-60	Male Neutered	No	9999	129	7	Border Collie breed rescue	I don't know	PET	9999	9999	9999	9999	2	One	9999	9999	9999	9999	9999	2	Never	Never	Never	4	2	MIX	1	1	1	1	0	0	0	0	0	1	0	0	0	0	0	0	1	1
EPI	0.0933	England	Yes	Female	46-60	Male Neutered	Yes	19.5	93	44	Breeder (Primarily show dogs)	Yes	COMPETIT	9999	9999	9999	9999	1	One	9999	9999	9999	9999	9999	0	Never	Never	Never	4	1	MIX	1	1	1	1	0	0	0	0	0	1	0	0	0	0	0	0	0	0
EPI	0.3226	England	Yes	Female	61-75	Male Neutered	No	17.5	93	8	Rescue centre (e.g. RSPCA, Dogs Trust, Blue Cross)	I don't know	WORKING	9999	9999	9999	9999	2	One	9999	9999	9999	9999	9999	0	Yes: but has now stopped	9999	Yes: but has now stopped	4	0	REWARD	1	1	1	1	0	0	0	0	0	0	0	0	0	0	0	0	0	1
EPI	0.039	Scotland	Yes	Female	61-75	Female Neutered	Yes	26	62	2	Breeder (Primarily pet dogs)	I don't know	PET	9999	9999	9999	9999	2	One	1	9999	9999	9999	9999	1	Yes: but has now stopped	Never	Never	3	0	REWARD	1	0	1	1	0	0	0	0	0	0	0	0	0	0	0	0	0	1
EPI	0.1939	England	Yes	Female	46-60	Male Neutered	Yes	17.5	28	3	Breeder (Primarily working dogs)	Yes	WORKING	0	0	0	0	2	Two	3	0	0	0	0	0	Yes: still participates	9999	9999	4	4	MIX	1	1	1	1	1	0	1	0	1	0	0	0	0	0	0	0	1	1
EPI	0.0944	England	Yes	Female	31-45	Female Entire	No	18	37	2	Breeder (Primarily working dogs)	Yes	WORKING	9999	9999	9999	9999	1	Two	4	9999	9999	9999	9999	5	Yes: but has now stopped	Never	Never	4	2	MIX	1	1	1	1	0	0	0	0	0	1	0	0	0	0	0	1	0	1
EPI	0.075	England	Yes	Male	46-60	Female Neutered	No	14	38	2	Farm	I don't know	PET	9999	9999	9999	9999	3	Two	9999	9999	9999	9999	9999	0	Never	Never	Never	3	2	MIX	1	0	1	1	0	0	0	0	0	1	0	0	0	0	0	1	0	1
EPI	0.1716	USA	Yes	Female	61-75	Female Neutered	No	17.2	41	2	Breeder (Primarily working dogs)	Yes	WORKING	9999	9999	9999	9999	2	Two	9999	9999	9999	9999	9999	1	Yes: but has now stopped	9999	9999	3	2	MIX	1	1	0	1	0	0	0	0	0	1	0	0	0	0	0	0	1	1
EPI	0.1325	England	Yes	Female	61-75	Male Entire	Yes	22.6	76	3	Farm	I don't know	WORKING	9999	9999	9999	9999	2	Two	0	0	0	6	1	0	Never	Never	Never	4	0	REWARD	1	1	1	1	0	0	0	0	0	0	0	0	0	0	0	0	0	0
EPI	0.1393	Canada	Yes	Female	61-75	Male Neutered	No	25	75	2	Breeder (Primarily working dogs)	No	WORKING	0	0	0	0	1	Three plus	0	0	0	0	0	1	Never	Never	Never	2	2	MIX	1	0	0	1	0	0	0	0	0	1	0	0	0	0	0	0	1	0
EPI	0.2622	England	Yes	Female	61-75	Female Neutered	No	24	31	2	Border Collie breed rescue	I don't know	PET	9999	9999	9999	9999	2	9999	3	9999	9999	9999	9999	0	Never	Never	Never	2	0	REWARD	1	0	0	1	0	0	0	0	0	0	0	0	0	0	0	0	0	1
EPI	0.1573	England	Yes	Female	31-45	Male Neutered	Yes	22	100	6	Family or friend	I don't know	PET	0	0	0	0	2	zNone	0	0	0	0	0	0	Never	Never	Never	4	0	REWARD	1	1	1	1	0	0	0	0	0	0	0	0	0	0	0	0	0	0
EPI	0.3103	Scotland	Yes	Female	46-60	Female Neutered	No	22	71	3	Farm	I don't know	PET	9999	9999	9999	9999	3	zNone	1	0	0	9999	0	2	Never	Never	Never	3	1	MIX	1	0	1	1	0	0	0	0	0	1	0	0	0	0	0	0	0	0
EPI	0.3941	USA	Yes	Female	46-60	Male Neutered	Yes	22	59	9999	Breeder (Primarily pet dogs)	I don't know	PET	0	0	0	0	2	One	2	0	0	0	0	4	Yes: but has now stopped	Never	Never	4	1	MIX	1	1	1	1	0	0	0	0	0	0	0	0	0	0	0	1	0	1
EPI	0.1862	England	Yes	Female	46-60	Male Neutered	Yes	26	38	5	Rescue centre (e.g. RSPCA, Dogs Trust, Blue Cross)	I don't know	WORKING	0	0	0	0	2	One	9999	9999	9999	9999	9999	0	Yes: still participates	9999	9999	4	0	REWARD	1	1	1	1	0	0	0	0	0	0	0	0	0	0	0	0	0	0
EPI	0.1962	England	Yes	Female	46-60	Female Neutered	No	19.8	70	2	Breeder (Primarily pet dogs)	I don't know	PET	0	0	0	0	2	One	3	0	0	0	0	2	Never	Never	Yes: but has now stopped	3	0	REWARD	1	0	1	1	0	0	0	0	0	0	0	0	0	0	0	0	0	0
EPI	0.1325	England	Yes	Female	46-60	Female Neutered	No	22.8	115	2	Rescue centre (e.g. RSPCA, Dogs Trust, Blue Cross)	I don't know	PET	0	0	0	0	1	One	0	0	0	0	0	4	Yes: but has now stopped	Never	Never	4	4	MIX	1	1	1	1	1	0	0	0	1	1	0	0	0	0	0	0	1	1
EPI	0.2518	England	Yes	Female	46-60	Female Neutered	No	19	45	2	Farm	I don't know	PET	9999	9999	9999	9999	5	One	9999	1	3	2	1	3	Never	Yes: but has now stopped	Never	3	1	MIX	1	0	1	1	0	0	0	0	0	1	0	0	0	0	0	0	0	1
EPI	0.1858	Scotland	Yes	Female	46-60	Male Neutered	Yes	17.4	75	9999	Family or friend	Yes	WORKING	0	0	0	0	3	Two	0	0	0	0	0	1	Yes: still participates	Never	Never	4	0	REWARD	1	1	1	1	0	0	0	0	0	0	0	0	0	0	0	0	0	1
EPI	0.5828	Scotland	Yes	Female	46-60	Male Neutered	Yes	19	39	4	Breeder (Primarily working dogs)	Yes	WORKING	0	0	0	0	3	Two	0	0	0	0	0	0	Yes: still participates	Never	Never	4	0	REWARD	1	1	1	1	0	0	0	0	0	0	0	0	0	0	0	0	0	0
EPI	0.1627	England	Yes	Female	61-75	Female Neutered	Yes	20	97	2	Breeder (Primarily show dogs)	Yes	WORKING	0	0	0	0	2	Two	0	0	0	0	0	0	9999	Yes: but has now stopped	9999	4	0	REWARD	1	1	1	1	0	0	0	0	0	0	0	0	0	0	0	0	0	0
EPI	0.0769	Canada	Yes	Female	31-45	Female Neutered	No	13	158	2	Breeder (Primarily pet dogs)	Yes	WORKING	9999	9999	9999	9999	4	Two	1	9999	9999	9999	9999	3	Yes: still participates	Never	Yes: but has now stopped	4	1	MIX	1	1	1	1	0	0	0	0	0	1	0	0	0	0	0	0	0	1
EPI	0.4129	Scotland	Yes	Female	18-30	Male Neutered	No	21	48	3	Rescue centre (e.g. RSPCA, Dogs Trust, Blue Cross)	I don't know	PET	9999	9999	9999	9999	3	Two	2	0	0	0	0	1	Yes: still participates	Never	Yes: but has now stopped	3	0	REWARD	1	0	1	1	0	0	0	0	0	0	0	0	0	0	0	0	0	0
EPI	0.4139	Canada	Yes	Female	46-60	Female Entire	No	9999	65	2	Breeder (Primarily working dogs)	Yes	WORKING	0	0	0	0	1	Three plus	0	0	0	0	0	3	Yes: still participates	Never	Yes: still participates	4	0	REWARD	1	1	1	1	0	0	0	0	0	0	0	0	0	0	0	0	0	0
EPI	0.1635	England	Yes	Female	18-30	Male Neutered	Yes	18	93	1.75	Family or friend	I don't know	WORKING	9999	9999	9999	9999	1	Three plus	0	0	0	0	6	2	Yes: but has now stopped	Never	Never	4	0	REWARD	1	1	1	1	0	0	0	0	0	0	0	0	0	0	0	0	0	0
EPI	0.2757	England	No	Female	46-60	Male Neutered	Yes	17.5	31	3	Farm	I don't know	WORKING	0	0	0	0	1	Three plus	0	0	0	0	0	3	Yes: still participates	Never	Never	4	0	REWARD	1	1	1	1	0	0	0	0	0	0	0	0	0	0	0	0	0	1
EPI	0.3457	England	Yes	Female	61-75	Male Neutered	Yes	17.5	48	2	Breeder (Primarily working dogs)	No	WORKING	9999	9999	9999	9999	2	Three plus	9999	9999	9999	9999	9999	0	Yes: still participates	9999	9999	4	1	MIX	1	1	1	1	0	0	0	0	0	1	0	0	0	0	0	0	0	0
EPI	0.4468	New Zealand	Yes	Female	46-60	Male Neutered	Yes	18.7	78	0	Breeder (Primarily working dogs)	Yes	WORKING	9999	9999	9999	9999	3	Three plus	1	0	0	0	0	0	Yes: still participates	Never	Never	3	0	REWARD	1	0	1	1	0	0	0	0	0	0	0	0	0	0	0	0	0	1
CONTROL	0.0846	Wales	Yes	Female	46-60	Female Neutered	No	9999	25	13	Rescue centre (e.g. RSPCA, Dogs Trust, Blue Cross)	I don't know	PET	0	0	0	0	6	zNone	3	0	0	0	0	3	Yes: but has now stopped	Yes: but has now stopped	Never	2	3	MIX	1	0	0	1	0	0	0	0	0	1	0	0	0	0	0	1	1	1
CONTROL	0.1875	Austria	Yes	Female	46-60	Female Neutered	No	15	31	3	Breeder (Primarily working dogs)	No	PET	0	0	2	0	2	zNone	1	0	0	0	0	9999	Yes: still participates	Yes: still participates	Never	4	0	REWARD	1	1	1	1	0	0	0	0	0	0	0	0	0	0	0	0	0	0
CONTROL	9999	England	Yes	Female	31-45	Male Entire	Yes	18	18	6	Family or friend	No	PET	0	0	0	1	3	zNone	0	0	0	0	6	0	Never	Never	Never	3	0	REWARD	1	0	1	1	0	0	0	0	0	0	0	0	0	0	0	0	0	1
CONTROL	0.0226	England	Yes	Female	18-30	Female Neutered	No	9999	48	2	Farm	I don't know	PET	0	0	0	0	3	zNone	1	0	0	9999	9999	0	Never	Never	Never	2	0	REWARD	1	0	1	0	0	0	0	0	0	0	0	0	0	0	0	0	0	0
CONTROL	0.0344	England	Yes	Female	31-45	Male Neutered	Yes	13	57	2	Breeder (Primarily working dogs)	No	WORKING	0	0	0	0	2	zNone	0	0	0	0	0	3	Yes: still participates	Never	Never	4	0	REWARD	1	1	1	1	0	0	0	0	0	0	0	0	0	0	0	0	0	1
CONTROL	9999	England	Yes	Female	46-60	Male Entire	No	21	16	2	Farm	I don't know	PET	0	0	0	0	2	zNone	0	0	0	0	0	1	Never	Never	Never	3	3	MIX	1	0	1	1	0	0	0	0	0	1	0	0	0	1	0	0	1	1
CONTROL	9999	England	Yes	Female	31-45	Male Neutered	No	19	57	9	Breeder (Primarily working dogs)	I don't know	PET	0	0	0	0	2	zNone	0	0	0	0	0	2	Yes: but has now stopped	Never	Never	4	0	REWARD	1	1	1	1	0	0	0	0	0	0	0	0	0	0	0	0	0	0
CONTROL	0.688	England	Yes	Female	31-45	Male Entire	No	20.2	23	3	Breeder (Primarily working dogs)	I don't know	PET	0	0	0	0	2	zNone	0	0	1	1	0	0	Never	Never	Never	4	2	MIX	1	1	1	1	0	0	0	0	0	1	0	0	0	0	0	1	0	1
CONTROL	0.4676	England	Yes	Female	46-60	Female Neutered	Yes	19	61	2	Breeder (Primarily show dogs)	No	WORKING	0	0	0	0	2	zNone	0	0	0	0	0	1	Yes: still participates	Yes: still participates	Never	3	2	MIX	1	0	1	1	0	0	0	0	0	1	0	0	0	0	0	0	1	1
CONTROL	0.2783	England	Yes	Female	61-75	Female Neutered	Yes	18	42	2	Breeder (Primarily pet dogs)	I don't know	PET	0	0	0	0	2	zNone	0	0	0	0	1	1	Yes: still participates	9999	9999	4	1	MIX	1	1	1	1	0	0	0	0	1	0	0	0	0	0	0	0	0	1
CONTROL	0.3414	England	Yes	Male	46-60	Female Neutered	No	22	61	2	Farm	I don't know	PET	0	0	0	0	2	zNone	0	0	0	0	0	0	Never	Never	Never	2	2	MIX	1	0	0	1	0	0	0	0	0	1	0	0	0	0	0	0	1	0
CONTROL	9999	England	Yes	Male	31-45	Male Neutered	No	21	102	68	Rescue centre (e.g. RSPCA, Dogs Trust, Blue Cross)	I don't know	PET	0	0	0	0	1	zNone	0	0	0	0	0	2	Never	Yes: still participates	Never	4	0	REWARD	1	1	1	1	0	0	0	0	0	0	0	0	0	0	0	0	0	1
CONTROL	9999	Scotland	Yes	Male	31-45	Male Entire	Yes	22	28	2	Breeder (Primarily working dogs)	I don't know	PET	0	0	0	0	1	zNone	2	0	0	0	0	2	Yes: still participates	Never	Never	2	0	REWARD	1	0	1	0	0	0	0	0	0	0	0	0	0	0	0	0	0	0
CONTROL	0.2698	England	Yes	Female	46-60	Male Neutered	No	25	131	3	Breeder (Primarily working dogs)	I don't know	PET	0	0	0	0	1	zNone	0	0	0	0	0	0	Yes: still participates	Never	Never	4	2	MIX	1	1	1	1	0	0	0	0	0	1	0	0	0	0	0	0	1	1
CONTROL	0.1811	England	Yes	Female	46-60	Male Neutered	No	21	71	3	Rescue centre (e.g. RSPCA, Dogs Trust, Blue Cross)	I don't know	PET	9999	9999	9999	9999	2	zNone	0	0	0	0	0	0	Never	Never	Never	3	1	MIX	1	0	1	1	0	0	1	0	0	0	0	0	0	0	0	0	0	1
CONTROL	9999	England	Yes	Female	46-60	Male Entire	No	23	101	2	Farm	No	PET	9999	9999	9999	9999	2	zNone	0	0	0	0	0	0	Never	Never	9999	3	3	MIX	1	0	1	1	0	0	0	0	0	1	0	0	0	0	0	1	1	0
CONTROL	0.4017	England	Yes	Female	31-45	Male Neutered	No	15	24	2	Breeder (Primarily pet dogs)	No	PET	9999	9999	9999	9999	2	zNone	0	0	0	0	0	4	Yes: but has now stopped	Never	Yes: but has now stopped	2	1	MIX	1	0	0	1	0	0	0	0	0	0	0	0	0	0	0	0	1	1
CONTROL	0.1407	England	Yes	Female	Prefer not to disclose	Female Neutered	Yes	12	52	2	Breeder (Primarily working dogs)	No	PET	9999	9999	9999	1	3	zNone	0	0	0	0	0	2	Never	Never	Never	4	1	MIX	1	1	1	1	0	0	0	0	0	1	0	0	0	0	0	0	0	1
CONTROL	9999	England	Yes	Female	61-75	Male Neutered	Yes	24	31	2	Breeder (Primarily pet dogs)	No	PET	9999	9999	9999	9999	1	zNone	0	0	0	0	0	0	Never	Never	Never	4	0	REWARD	1	1	1	1	0	0	0	0	0	0	0	0	0	0	0	0	0	0
CONTROL	9999	England	Yes	Female	46-60	Male Entire	Yes	19	19	2	Breeder (Primarily pet dogs)	No	WORKING	9999	1	9999	9999	2	zNone	0	0	0	0	0	4	Yes: still participates	9999	9999	3	0	REWARD	1	0	1	1	0	0	0	0	0	0	0	0	0	0	0	0	0	1
CONTROL	0.317	Netherlands	Yes	Female	31-45	Female Entire	Yes	18	50	2	Breeder (Primarily working dogs)	Yes	PET	0	1	1	0	4	One	0	0	0	0	6	3	Never	Never	Never	4	1	MIX	1	1	1	1	0	0	0	1	0	0	0	0	0	0	0	0	0	0
CONTROL	0.2541	England	Yes	Female	46-60	Male Neutered	Yes	20	42	3	Breeder (Primarily working dogs)	No	PET	0	0	1	0	3	One	0	0	0	0	0	0	Yes: still participates	Never	Never	4	0	REWARD	1	1	1	1	0	0	0	0	0	0	0	0	0	0	0	0	0	0
CONTROL	0.0009	England	Yes	Female	31-45	Male Entire	Yes	16.5	11	2	Family or friend	No	WORKING	0	0	0	0	3	One	1	0	0	0	0	2	Yes: still participates	Never	Never	3	1	MIX	1	1	1	0	0	0	0	0	0	0	0	0	0	0	0	1	0	1
CONTROL	0.2097	Germany	Yes	Female	46-60	Male Entire	No	22	9999	2	Breeder (Primarily working dogs)	No	WORKING	0	0	0	1	2	One	0	0	0	0	0	0	Yes: still participates	Never	Never	4	1	MIX	1	1	1	1	0	0	0	0	0	1	0	0	0	0	0	0	0	0
CONTROL	0.0914	Scotland	Yes	Male	31-45	Female Neutered	No	17	42	2	Family or friend	I don't know	PET	0	0	0	0	2	One	0	0	0	0	0	0	Yes: still participates	Never	Never	4	2	MIX	1	1	1	1	0	0	0	0	0	1	0	0	0	0	0	1	0	0
CONTROL	0.0757	England	Yes	Female	46-60	Female Entire	No	25	67	2	Farm	I don't know	PET	0	0	0	0	2	One	1	0	0	0	0	2	Never	Never	Never	3	1	MIX	1	0	1	1	0	0	0	0	0	0	0	0	0	0	0	0	1	0
CONTROL	0.1954	England	Yes	Female	18-30	Male Neutered	Yes	14.2	56	2	Breeder (Primarily pet dogs)	I don't know	WORKING	0	0	0	0	2	One	0	0	0	0	0	2	Yes: still participates	Never	Yes: still participates	4	2	MIX	1	1	1	1	0	0	0	0	0	1	0	0	0	0	0	1	0	1
CONTROL	0.2301	England	Yes	Female	31-45	Male Neutered	I don't know	20	97	75	Family or friend	No	PET	0	0	0	0	2	One	0	0	0	0	6	1	Never	Never	Never	3	0	REWARD	1	0	1	1	0	0	0	0	0	0	0	0	0	0	0	0	0	0
CONTROL	0.1446	England	Yes	Female	46-60	Male Neutered	Yes	20	42	2	Breeder (Primarily working dogs)	No	PET	0	0	0	0	2	One	3	0	0	0	0	2	Never	Never	Yes: but has now stopped	3	3	MIX	1	0	1	1	0	0	0	0	0	1	0	0	0	0	0	1	1	1
CONTROL	0.2174	Wales	Yes	Female	31-45	Female Neutered	No	17.04	17	2.25	Farm	No	PET	0	0	0	0	2	One	0	0	0	0	6	0	Never	Never	Never	4	5	MIX	1	1	1	1	0	0	0	0	1	1	0	0	0	0	1	1	1	1
CONTROL	0.1673	England	Yes	Female	46-60	Female Neutered	Yes	20	106	10	Family or friend	I don't know	COMPETIT	0	0	0	0	2	One	0	0	0	0	0	0	Yes: still participates	Never	Never	3	1	MIX	1	0	1	1	0	0	0	0	0	0	0	0	0	0	0	1	0	0
CONTROL	0.2984	England	Yes	Female	46-60	Female Neutered	Yes	15.3	19	2	Family or friend	No	PET	0	0	0	0	2	One	0	0	4	0	0	0	Yes: still participates	Never	Never	3	1	MIX	1	0	1	1	0	0	0	0	0	1	0	0	0	0	0	0	0	0
CONTROL	0.2517	England	Yes	Female	31-45	Male Neutered	No	16.5	62	2	Farm	I don't know	PET	0	0	0	0	2	One	0	0	0	0	0	0	Yes: but has now stopped	Never	Yes: but has now stopped	3	0	REWARD	1	0	1	1	0	0	0	0	0	0	0	0	0	0	0	0	0	0
CONTROL	0.4473	Wales	Yes	Female	46-60	Female Neutered	No	9999	164	2	Farm	No	PET	0	0	0	0	2	One	1	9999	9999	9999	9999	3	Never	Never	Yes: but has now stopped	3	1	MIX	1	0	1	1	0	0	0	0	0	1	0	0	0	0	0	0	0	0
CONTROL	0.1195	England	Yes	Female	46-60	Male Neutered	Yes	21	40	2	Breeder (Primarily pet dogs)	No	WORKING	0	0	0	0	1	One	9999	9999	9999	9999	2	2	Yes: still participates	Never	Never	4	0	REWARD	1	1	1	1	0	0	0	0	0	0	0	0	0	0	0	0	0	1
CONTROL	0.5064	Wales	Yes	Female	61-75	Male Neutered	Yes	16	53	2	Breeder (Primarily pet dogs)	No	PET	9999	9999	9999	9999	2	One	9999	9999	9999	9999	9999	0	Yes: still participates	9999	9999	4	0	REWARD	1	1	1	1	0	0	0	0	0	0	0	0	0	0	0	0	0	1
CONTROL	0.3478	England	Yes	Female	46-60	Female Entire	No	18	52	0	Breeder (Primarily pet dogs)	No	PET	9999	9999	9999	1	2	One	0	0	0	0	0	2	Never	Never	Never	4	1	MIX	1	1	1	1	0	0	0	0	0	1	0	0	0	0	0	0	0	1
CONTROL	9999	England	Yes	Male	46-60	Female Neutered	No	19	36	2	Farm	No	PET	9999	9999	9999	9999	3	One	0	0	0	0	0	2	Never	Never	Never	2	2	MIX	1	0	0	1	0	0	0	0	0	1	0	0	0	0	0	0	1	1
CONTROL	0.1771	England	Yes	Female	46-60	Female Neutered	Yes	13	149	2	Breeder (Primarily working dogs)	I don't know	WORKING	0	0	9999	0	0	One	0	0	0	0	2	1	Yes: still participates	Never	Never	4	2	MIX	1	1	1	1	0	0	0	0	0	1	0	0	0	0	0	0	1	0
CONTROL	0.2048	England	No	Female	61-75	Male Neutered	No	21	98	6	9999	I don't know	PET	9999	9999	9999	9999	3	One	9999	9999	9999	9999	9999	0	Never	Never	Never	2	2	MIX	1	0	0	1	0	0	0	0	1	1	0	0	0	0	0	0	0	1
CONTROL	0.2457	England	Yes	Female	31-45	Male Neutered	No	23.4	71	1.75	Breeder (Primarily working dogs)	I don't know	WORKING	9999	9999	9999	9999	2	One	1	9999	9999	9999	9999	0	Yes: still participates	Never	Never	3	1	MIX	1	0	1	1	0	0	0	0	0	1	0	0	0	0	0	0	0	1
CONTROL	0.0851	England	Yes	Female	46-60	Female Neutered	No	13	21	2	Farm	I don't know	PET	9999	9999	9999	9999	5	One	9999	1	3	2	1	3	Yes: still participates	Never	Never	3	1	MIX	1	0	1	1	0	0	0	0	0	1	0	0	0	0	0	0	0	1
CONTROL	0.193	England	Yes	Male	31-45	Male Neutered	No	23	71	2	Breeder (Primarily pet dogs)	I don't know	PET	9999	9999	1	9999	3	One	9999	9999	9999	9999	9999	1	Never	Never	Never	9999	0	9999	9999	0	1	1	0	0	0	0	0	0	0	0	0	0	0	0	0	1
CONTROL	0.2992	England	Yes	Female	46-60	Male Neutered	Yes	31.7	101	2	Breeder (Primarily working dogs)	No	PET	9999	9999	9999	9999	1	One	5	0	0	0	0	1	Never	Never	Never	3	1	MIX	1	0	1	1	0	0	0	0	1	0	0	0	0	0	0	0	0	1
CONTROL	0.0363	England	Yes	Female	46-60	Male Entire	Yes	17	21	2	Family or friend	I don't know	PET	9999	9999	9999	9999	3	One	9999	9999	9999	9999	9999	0	Yes: still participates	Never	Never	4	1	MIX	1	1	1	1	0	0	0	0	0	0	0	0	0	0	0	1	0	0
CONTROL	0.1844	England	Yes	Female	31-45	Female Neutered	No	14.5	59	1	Farm	I don't know	PET	9999	9999	9999	9999	2	One	0	0	0	0	0	1	Never	Never	Never	4	4	MIX	1	1	1	1	0	0	1	0	0	1	0	0	0	0	0	1	1	1
CONTROL	0.1884	England	Yes	Female	46-60	Female Neutered	Yes	14	93	2	Breeder (Primarily working dogs)	No	WORKING	0	0	0	1	6	Two	3	0	5	0	6	0	Yes: still participates	Never	Never	3	1	MIX	1	0	1	1	0	0	0	0	0	0	0	0	0	0	0	0	1	1
CONTROL	0.1395	England	Yes	Female	46-60	Male Entire	Yes	17	9	2	Breeder (Primarily working dogs)	Yes	WORKING	0	0	0	0	2	Two	0	0	0	0	0	4	Yes: still participates	Never	Never	4	0	REWARD	1	1	1	1	0	0	0	0	0	0	0	0	0	0	0	0	0	0
CONTROL	0.3811	England	Yes	Female	46-60	Female Neutered	Yes	17	42	2	Breeder (Primarily working dogs)	Yes	WORKING	0	0	0	0	2	Two	9999	9999	9999	9999	9999	9999	Never	Never	Never	3	0	REWARD	1	0	1	1	0	0	0	0	0	0	0	0	0	0	0	0	0	0
CONTROL	0.7349	England	Yes	Male	61-75	Female Entire	Yes	13	13	2	Breeder (Primarily working dogs)	I don't know	COMPETIT	0	0	0	0	2	Two	0	0	0	0	0	2	Never	Never	Yes: still participates	3	2	MIX	1	0	1	1	0	0	0	0	0	1	0	0	0	0	0	0	1	0
CONTROL	0.4362	Switzerland	Yes	Female	61-75	Male Entire	Yes	15.8	80	2	Breeder (Primarily pet dogs)	No	WORKING	0	0	0	0	2	Two	9999	9999	9999	9999	9999	0	Never	Yes: but has now stopped	Never	4	0	REWARD	1	1	1	1	0	0	0	0	0	0	0	0	0	0	0	0	0	0
CONTROL	9999	Germany	Yes	Female	18-30	Female Entire	No	15.6	52	2	Breeder (Primarily working dogs)	Yes	WORKING	0	0	0	0	2	Two	0	0	0	0	0	1	Yes: still participates	Never	Never	4	1	MIX	1	1	1	1	0	0	0	0	0	1	0	0	0	0	0	0	0	0
CONTROL	0.0554	England	Yes	Female	46-60	Male Neutered	Yes	18	31	10	Rescue centre (e.g. RSPCA, Dogs Trust, Blue Cross)	I don't know	PET	0	0	0	0	2	Two	0	0	0	0	6	2	Yes: still participates	Never	Never	4	2	MIX	1	1	1	1	0	0	0	0	0	1	0	0	0	0	0	0	1	1
CONTROL	9999	England	Yes	Female	46-60	Male Neutered	Yes	22	80	3	Farm	No	WORKING	0	0	0	0	2	Two	0	0	0	0	0	2	Yes: but has now stopped	Never	Yes: still participates	3	0	REWARD	1	1	0	1	0	0	0	0	0	0	0	0	0	0	0	0	0	0
CONTROL	0.4007	England	Yes	Female	46-60	Male Entire	Yes	19	53	2	Breeder (Primarily pet dogs)	No	PET	0	0	0	0	1	Two	0	0	0	0	0	0	Yes: still participates	Never	Never	4	1	MIX	1	1	1	1	0	0	0	0	0	1	0	0	0	0	0	0	0	0
CONTROL	0.3361	England	Yes	Female	46-60	Female Neutered	Yes	14	25	4	Farm	I don't know	PET	0	0	0	0	1	Two	0	0	0	0	0	0	Yes: still participates	Never	Never	3	1	MIX	1	1	0	1	0	0	0	0	0	1	0	0	0	0	0	0	0	1
CONTROL	0.1421	England	Yes	Female	46-60	Male Neutered	Yes	16	89	2	Breeder (Primarily working dogs)	No	WORKING	0	0	0	0	1	Two	0	0	0	0	0	0	Yes: still participates	Never	Never	4	2	MIX	1	1	1	1	0	0	0	0	0	1	0	0	0	0	0	1	0	0
CONTROL	0.3234	England	Yes	Female	31-45	Female Neutered	No	15.6	121	2	Breeder (Primarily working dogs)	I don't know	PET	0	0	0	0	1	Two	0	0	0	0	0	3	Never	Never	Yes: still participates	3	0	REWARD	1	0	1	1	0	0	0	0	0	0	0	0	0	0	0	0	0	0
CONTROL	0.3457	England	Yes	Female	61-75	Female Neutered	Yes	18	73	0	Family or friend	No	WORKING	0	0	0	0	1	Two	0	0	0	0	0	9999	Yes: still participates	Never	Yes: still participates	4	0	REWARD	1	1	1	1	0	0	0	0	0	0	0	0	0	0	0	0	0	0
CONTROL	0.0888	England	Yes	Female	46-60	Female Neutered	No	16	8	1	Rescue centre (e.g. RSPCA, Dogs Trust, Blue Cross)	I don't know	WORKING	9999	9999	9999	9999	3	Two	2	9999	9999	9999	9999	0	Never	Never	Never	4	0	REWARD	1	1	1	1	0	0	0	0	0	0	0	0	0	0	0	0	0	0
CONTROL	9999	England	Yes	Male	46-60	Male Neutered	No	18	38	2	Farm	I don't know	PET	9999	9999	9999	9999	3	Two	9999	9999	9999	9999	9999	0	Never	Never	Never	3	1	MIX	1	0	1	1	0	0	0	0	0	1	0	0	0	0	0	0	0	1
CONTROL	0.3264	Netherlands	Yes	Female	46-60	Male Entire	Yes	23	53	2	Breeder (Primarily working dogs)	Yes	WORKING	9999	9999	9999	9999	2	Two	9999	9999	9999	2	3	0	Never	Never	Never	4	1	MIX	1	1	1	1	0	0	0	0	0	1	0	0	0	0	0	0	0	1
CONTROL	0.5202	England	Yes	Female	46-60	Male Entire	Yes	18	11	11	Breeder (Primarily show dogs)	No	WORKING	9999	9999	2	9999	9999	Two	9999	9999	9999	9999	9999	2	Yes: still participates	Never	Never	4	3	MIX	1	1	1	1	0	0	0	0	0	1	0	0	0	0	0	1	1	1
CONTROL	0.2053	England	Yes	Female	61-75	Male Neutered	Yes	20	75	5	Breeder (Primarily pet dogs)	I don't know	PET	9999	9999	9999	9999	2	Two	9999	9999	9999	9999	9999	0	Yes: but has now stopped	Never	Never	4	2	MIX	1	1	1	1	0	0	0	0	0	1	0	0	0	0	0	0	1	1
CONTROL	9999	England	Yes	Female	46-60	Male Entire	Yes	19	27	2	Breeder (Primarily pet dogs)	No	WORKING	9999	9999	9999	9999	2	Two	1	9999	9999	9999	9999	2	Yes: still participates	Never	Never	4	1	MIX	1	1	1	1	0	0	0	0	0	0	0	0	0	0	0	1	0	1
CONTROL	0.281	England	Yes	Female	61-75	Male Entire	No	22	108	2	Breeder (Primarily working dogs)	No	WORKING	9999	9999	9999	9999	2	Two	9999	9999	9999	9999	9999	2	Yes: still participates	9999	9999	4	1	MIX	1	1	1	1	0	0	0	0	0	1	0	0	0	0	0	0	0	1
CONTROL	0.2584	England	Yes	Female	61-75	Female Neutered	No	18.5	57	2	Breeder (Primarily working dogs)	Yes	WORKING	9999	9999	9999	9999	2	Two	9999	9999	9999	9999	9999	2	Yes: still participates	9999	9999	3	1	MIX	1	0	1	1	0	0	0	0	0	1	0	0	0	0	0	0	0	1
CONTROL	0.3582	Scotland	Yes	Female	31-45	Male Neutered	No	19	42	8	Rescue centre (e.g. RSPCA, Dogs Trust, Blue Cross)	I don't know	PET	1	9999	9999	9999	1	Two	9999	9999	9999	9999	9999	4	Yes: but has now stopped	Never	Never	3	1	MIX	1	0	1	1	0	0	0	0	0	1	0	0	0	0	0	0	0	1
CONTROL	9999	England	Yes	Female	46-60	Female Entire	Yes	19	60	0	Breeder (Primarily pet dogs)	No	PET	0	0	0	0	3	Three plus	1	0	0	0	2	1	Yes: still participates	Never	Never	4	0	REWARD	1	1	1	1	0	0	0	0	0	0	0	0	0	0	0	0	0	0
CONTROL	0.169	Wales	Yes	Male	31-45	Male Entire	Yes	16	9	2	Breeder (Primarily working dogs)	No	WORKING	0	0	0	0	1	Three plus	0	0	0	0	0	1	Yes: still participates	Never	Never	4	0	REWARD	1	1	1	1	0	0	0	0	0	0	0	0	0	0	0	0	0	1
CONTROL	0.1095	England	Yes	Female	61-75	Female Entire	Yes	20	102	2	Breeder (Primarily show dogs)	No	PET	9999	9999	9999	9999	1	Three plus	9999	9999	9999	9999	9999	3	Yes: but has now stopped	Yes: but has now stopped	9999	2	0	REWARD	1	0	0	1	0	0	0	0	0	0	0	0	0	0	0	0	0	0
CONTROL	0.3571	Jersey	Yes	Female	46-60	Female Neutered	Yes	17	89	2	Breeder (Primarily show dogs)	No	PET	1	9999	9999	9999	1	Three plus	1	9999	1	6	1	2	Yes: still participates	9999	Yes: but has now stopped	4	4	MIX	1	1	1	1	0	0	1	0	0	1	0	0	0	0	0	1	1	1
CONTROL	9999	England	Yes	Female	31-45	Female Neutered	No	21	32	2	Breeder (Primarily pet dogs)	No	PET	1	1	9999	9999	2	Three plus	3	0	0	6	0	3	Never	Never	Never	3	0	REWARD	1	1	1	0	0	0	0	0	0	0	0	0	0	0	0	0	0	0
CONTROL	9999	Netherlands	Yes	Female	18-30	Female Entire	Yes	15	30	2	Breeder (Primarily working dogs)	No	WORKING	1	2	9999	9999	2	Three plus	0	0	0	2	0	1	Never	Never	Never	4	3	MIX	1	1	1	1	0	0	0	0	0	1	0	0	0	0	0	1	1	1
CONTROL	1.1324	Wales	Yes	Female	31-45	Male Entire	No	25	93	0	Farm	No	WORKING	0	0	0	0	2	Three plus	1	0	0	0	0	8	Never	Never	Never	2	1	MIX	1	0	0	1	0	0	0	0	0	1	0	0	0	0	0	0	0	0
CONTROL	0.3117	England	Yes	Female	31-45	Male Entire	Yes	16.3	32	2	Breeder (Primarily working dogs)	No	WORKING	9999	9999	9999	9999	2	Three plus	9999	9999	9999	9999	9999	2	Yes: still participates	Never	Never	4	2	MIX	1	1	1	1	0	0	0	0	0	1	0	0	0	0	0	0	1	0
CONTROL	1.0635	England	Yes	Female	46-60	Male Neutered	Yes	20	76	2	Breeder (Primarily pet dogs)	Yes	WORKING	9999	9999	9999	9999	5	Three plus	9999	9999	9999	9999	6	3	Yes: still participates	9999	9999	4	4	MIX	1	1	1	1	1	0	1	0	0	1	0	0	0	0	0	0	1	1
CONTROL	1.5813	England	Yes	Female	46-60	Male Entire	Yes	23	114	2	Breeder (Primarily working dogs)	Yes	WORKING	9999	9999	9999	9999	3	Three plus	9999	9999	9999	9999	9999	0	Yes: but has now stopped	Never	Yes: but has now stopped	4	3	MIX	1	1	1	1	0	0	1	0	1	1	0	0	0	0	0	0	0	1
CONTROL	0.542	England	Yes	Female	31-45	Male Entire	Yes	16.6	66	2	Breeder (Primarily working dogs)	I don't know	WORKING	0	0	0	0	2	Three plus	0	0	0	0	0	1	Yes: still participates	Never	Never	4	0	REWARD	1	1	1	1	0	0	0	0	0	0	0	0	0	0	0	0	0	1
CONTROL	0.3006	England	Yes	Female	61-75	Male Neutered	Yes	21	80	0	9999	Yes	WORKING	9999	9999	9999	9999	2	Three plus	9999	9999	9999	9999	9999	1	Yes: still participates	9999	9999	4	0	REWARD	1	1	1	1	0	0	0	0	0	0	0	0	0	0	0	0	0	0
CONTROL	0.3035	Scotland	Yes	Female	18-30	Female Neutered	Yes	14	62	2	Breeder (Primarily pet dogs)	Yes	WORKING	0	0	0	0	3	Three plus	1	0	0	0	6	0	Yes: still participates	Never	Never	4	1	MIX	1	1	1	1	0	0	0	0	0	0	0	0	0	0	0	1	0	1
CONTROL	0.2373	England	Yes	Female	46-60	Female Neutered	No	14	14	3	Breeder (Primarily working dogs)	No	PET	0	0	0	0	0	Three plus	0	0	0	0	9999	2	Yes: but has now stopped	Never	Never	4	4	MIX	1	1	1	1	0	0	0	0	0	1	0	0	0	1	0	1	1	0
CONTROL	0.5603	England	Yes	Female	46-60	Male Neutered	Yes	19.2	60	2	Breeder (Primarily show dogs)	No	WORKING	9999	9999	2	9999	9999	9999	9999	9999	9999	2	9999	2	Yes: still participates	9999	9999	4	1	MIX	1	1	1	1	0	0	0	0	0	0	0	0	0	0	0	1	0	1
CONTROL	0.1921	England	Yes	Female	31-45	Female Entire	No	19.6	8	2	Breeder (Primarily pet dogs)	I don't know	PET	9999	2	9999	9999	9999	9999	1	9999	9999	9999	9999	2	Never	Never	Yes: still participates	4	1	MIX	1	1	1	1	0	0	0	0	0	0	0	0	0	0	0	1	0	0
CONTROL	9999	Austria	Yes	Female	18-30	Female Entire	No	17	30	4	Farm	I don't know	WORKING	9999	9999	9999	9999	2	9999	9999	9999	9999	9999	9999	0	Yes: still participates	Yes: but has now stopped	Never	4	3	MIX	1	1	1	1	0	0	0	0	0	1	0	0	0	0	0	1	1	1
CONTROL	0.139	Wales	Yes	Female	18-30	Male Neutered	No	20	121	3	Family or friend	Yes	PET	9999	9999	9999	9999	3	9999	1	9999	9999	9999	9999	0	Yes: but has now stopped	Never	Yes: but has now stopped	4	4	MIX	1	1	1	1	0	0	1	0	0	1	0	1	0	0	0	0	1	1
CONTROL	0.1328	England	Yes	Male	31-45	Male Neutered	No	21	43	2	Breeder (Primarily working dogs)	No	PET	9999	9999	9999	9999	2	9999	4	9999	9999	9999	9999	1	Never	Never	Never	3	1	MIX	1	1	0	1	0	0	0	0	0	1	0	0	0	0	0	0	0	0
CONTROL	0.0184	USA	Yes	Female	31-45	Male Entire	Yes	14	7	3	Breeder (Primarily show dogs)	No	PET	9999	2	9999	9999	2	9999	9999	3	9999	3	9999	2	Never	Never	Never	4	3	MIX	1	1	1	1	0	0	0	0	0	1	0	0	0	0	0	1	1	1
CONTROL	0.0412	England	Yes	Male	46-60	Female Entire	No	22	132	42	Family or friend	I don't know	WORKING	9999	9999	9999	9999	2	9999	9999	9999	9999	9999	9999	1	Never	Never	Never	3	2	MIX	1	0	1	1	0	0	0	0	0	1	0	0	0	0	0	0	1	1
CONTROL	0.1776	Wales	Yes	Male	46-60	Male Entire	No	18	22	2	Farm	No	PET	9999	9999	1	1	2	9999	9999	9999	9999	9999	9999	1	Never	Never	Never	3	2	MIX	1	0	1	1	0	0	0	0	0	0	0	1	0	0	0	0	1	0
CONTROL	0.1417	Scotland	Yes	Female	46-60	Male Neutered	No	20	77	4	Farm	No	PET	9999	9999	9999	9999	3	9999	2	9999	9999	9999	1	10	Never	Never	Never	9999	1	MIX	9999	0	0	0	0	0	0	0	0	1	0	0	0	0	0	0	0	0
[truncated: 72 more columns]
